# Supplementary material for: Myeloid‐resident neuropilin‐1 promotes choroidal neovascularization while mitigating inflammation
Source: PubMed Central journal article supplement (PMC8103107; doi:10.15252/emmm.201911754), 2021-04-19
Supplement: EMMM-13-e11754-s001.pdf [file EMMM-13-e11754-s001.pdf]

## Expanded View Figures

### Figure EV1. Mononuclear phagocyte-resident NRP1 expression in *LysM-Cre/Nrp1<sup>fl/fl</sup>*.

- A Gating scheme explaining the identification of the Ly6G<sup>-</sup>, F4/80<sup>+</sup>, CD11b<sup>+</sup>, and NRP1<sup>+</sup> mononuclear phagocytes in retinas and sclera-choroid-RPE cell complexes. 1. Gating of live cells, 2. Removal of doublets, 3. Selection of viable cells, 4. Exclusion of neutrophils, 5. Gating of mononuclear phagocytes, 6. Gating of NRP1<sup>+</sup> mononuclear macrophages.
- B FACS histogram of APC-conjugated rat IgG2A isotype control (red) versus anti-mNRP1 APC-conjugated rat IgG2A (R&D systems) (blue).
- C FACS histogram of FMO (fluorescence minus one) versus anti-mNRP1 APC-conjugated rat IgG2A.
- D, E Quantification of NRP1-positive microglia (Ly6G<sup>-</sup>, F4/80<sup>+</sup>, CD11b<sup>+</sup>, CX3CR1<sup>hi</sup>, CD45<sup>lo</sup>, NRP1<sup>+</sup>) in retinas and sclera-choroid-RPE cell complexes in Naïve (non-burned) mice (D); *n* = 4 and at D3 (E); *n* = 4.
- F, G Quantification of mononuclear phagocytes (Ly6G<sup>-</sup>, F4/80<sup>+</sup>, CD11b<sup>+</sup>) in retinas and sclera-choroid-RPE cell complexes in Naïve (non-burned) mice (F); *n* = 5 (*LysM-Cre/Nrp1<sup>+/+</sup>*), 4 (*LysM-Cre/Nrp1<sup>fl/fl</sup>*) and at D3 (G); *n* = 4.
- H Compilation of representative compressed Z-stack confocal images of FITC-dextran-labeled CNV and IB4-stained laser impact area from *LysM-Cre/Nrp1<sup>+/+</sup>* and *LysM-Cre/Nrp1<sup>fl/fl</sup>* mice at D7. Scale bar: 20 μm.
- I–K Quantification of area of FITC-dextran-labeled CNV (I), isolectin B4 (IB4)-stained laser impact area (J) and the ratio of FITC/IB4 per laser burn (K) relative to *LysM-Cre/Nrp1<sup>+/+</sup>* at D7; *n* = 14 burns (*LysM-Cre/Nrp1<sup>+/+</sup>*), *n* = 20 burns (*LysM-Cre/Nrp1<sup>fl/fl</sup>*).

Data information: All comparisons between groups were analyzed using a Student's unpaired *t*-test; \*\**P* < 0.01, \*\*\**P* < 0.001; error bars represent mean ± SEM; exact *P* values listed in Table 2.

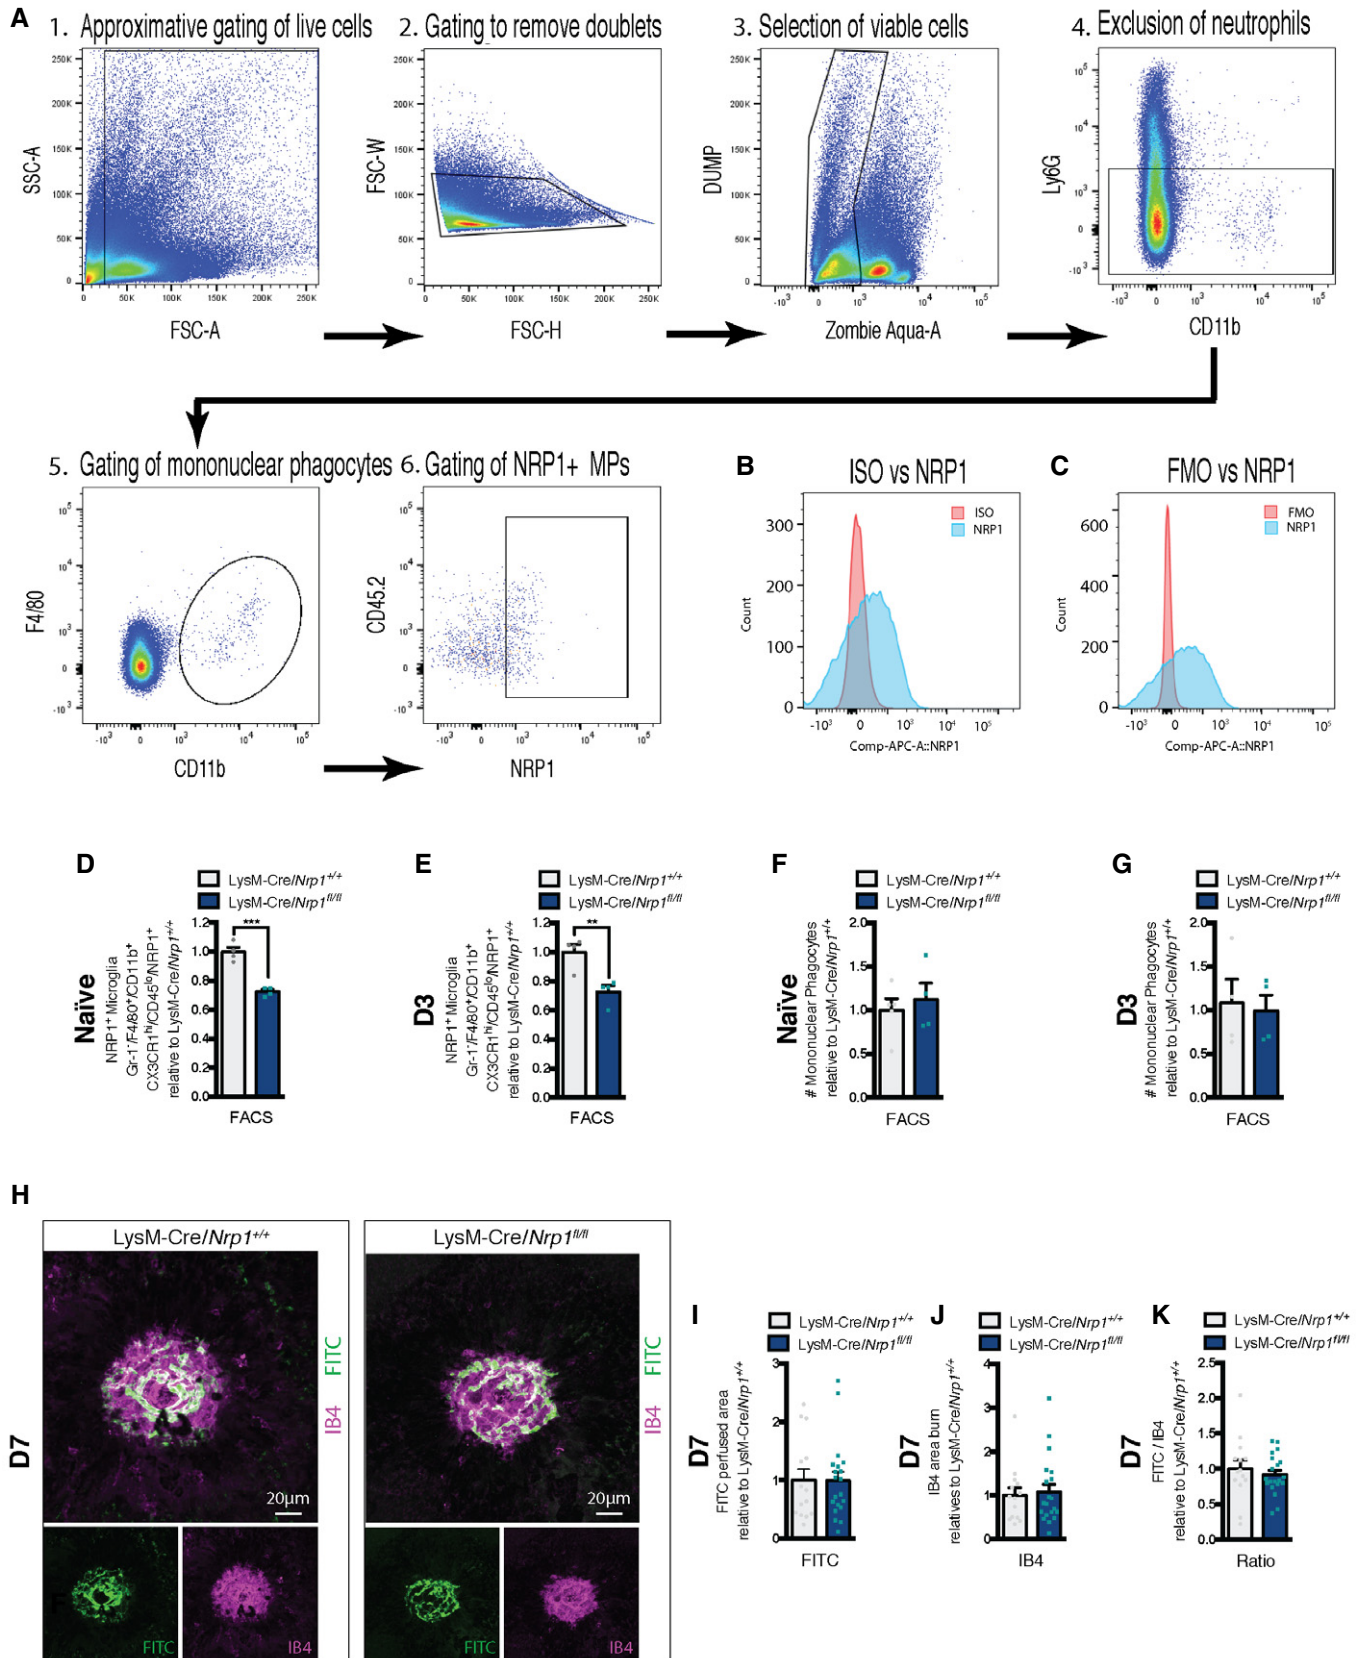

Figure EV1.

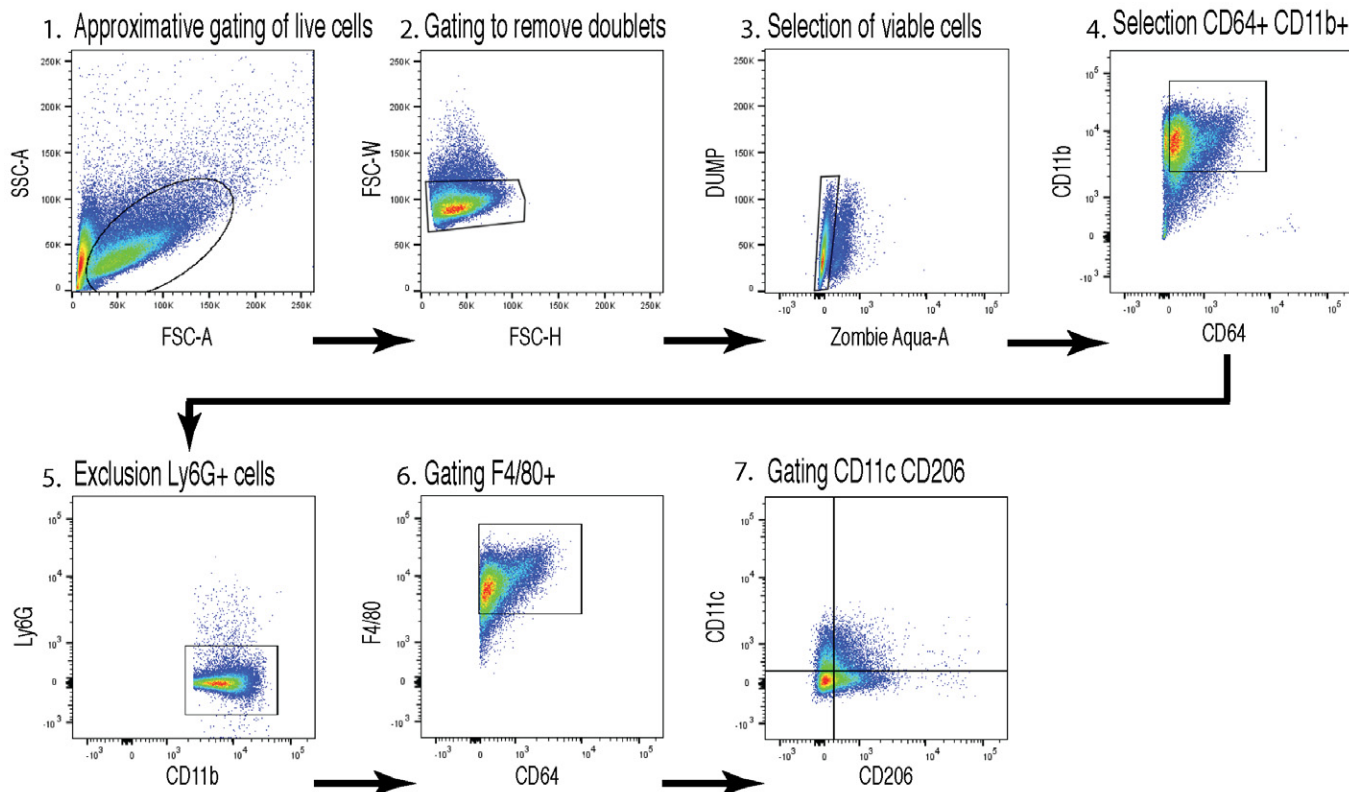

**Figure EV2. Gating scheme explaining the identification of the Ly6G<sup>-</sup>, F4/80<sup>+</sup>, CD11b<sup>+</sup>, CD11c<sup>+</sup>, CD206<sup>-</sup> and Ly6G<sup>-</sup>, F4/80<sup>+</sup>, CD11b<sup>+</sup>, CD11c<sup>-</sup>, CD206<sup>+</sup> BMDMs.**

1. gating of live cells, 2. removal of doublets, 3. selection of viable cells, 4. Selection of myeloid cells (CD64+) 5. exclusion of neutrophils, 6. gating of mononuclear macrophages, 7. Gating on CD11c and CD206.

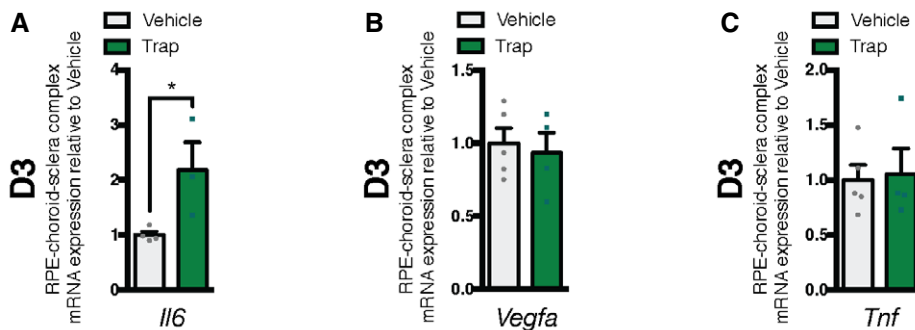

**Figure EV3. Inflammatory state of RPE-choroid-sclera complexes following treatment with trap.**

A–C mRNA expression of inflammation markers relative to vehicle in mouse RPE-choroid-sclera complexes at D3 for *I16* (A); *n* = 4 (vehicle), *n* = 4 (trap), *Vegfa* (B); *n* = 5 (vehicle), *n* = 4 (trap), *Tnf* (C); *n* = 5 (vehicle), *n* = 4 (trap).

Data information: All comparisons between groups were analyzed using a Student's unpaired *t*-test; \**P* < 0.05; error bars represent mean ± SEM; exact *P* values listed in Table 2.
