# Supplementary material for: Myeloid‐resident neuropilin‐1 promotes choroidal neovascularization while mitigating inflammation
Source: PubMed Central journal article supplement (PMC8103107; doi:10.15252/emmm.201911754), 2021-04-19
Supplement: EMMM-13-e11754-s003.pdf [file EMMM-13-e11754-s003.pdf]

**Title: Myeloid-resident Neuropilin-1 promotes Choroidal Neovascularization while Mitigating Inflammation**

**Authors:**

Elisabeth MMA Andriessen<sup>1#</sup>, François Binet<sup>2,3#</sup>, Frédéric Fournier<sup>4</sup>, Masayuki Hata<sup>4</sup>, Agnieszka Dejda<sup>3</sup>, Gaëlle Mawambo<sup>4</sup>, Sergio Crespo-Garcia<sup>3,4</sup>, Frédérique Pilon<sup>3</sup>, Manuel Buscarlet<sup>4</sup>, Karine Beauchemin<sup>2</sup>, Veronique Bougie<sup>2</sup>, Garth Cumberland<sup>2</sup>, Ariel M Wilson<sup>3</sup>, Steve Bourgault<sup>6</sup>, Flavio A Rezende<sup>3</sup>, Normand Beaulieu<sup>2</sup>, Jean-Sébastien Delisle<sup>5</sup>, Przemyslaw Sapieha<sup>1,2,3,4\*</sup>

**Affiliations:**

Departments of <sup>1</sup>Biomedical Sciences, <sup>3</sup>Ophthalmology, <sup>4</sup>Biochemistry and Molecular Medicine and <sup>5</sup>Medicine, Maisonneuve-Rosemont Hospital Research Centre, University of Montreal, Montreal, Quebec, H1T 2M4, Canada.

<sup>2</sup>SemaThera Inc. 4 Westmount Square, Suite 160, Montreal, Quebec, H3Z 2S6, Canada.

<sup>6</sup>Department of Chemistry, Université du Québec à Montréal, Montreal, Quebec, H2L 2C4, Canada

# These authors contributed equally.

**Contact:**

Przemyslaw (Mike) Sapieha, Ph.D.  
Maisonneuve-Rosemont Hospital Research Centre  
Research Centre 5415 Assomption Boulevard, Montreal,  
QC, H1T 2M4, Canada.  
TEL: (514) 252-3400 ext. 7711. FAX: (514) 252-3430  
E-mail: mike.sapieha@umontreal.ca

**Appendix Table S1**

| Graph                         | Data  | P-value          | Test used         | Summary |
|-------------------------------|-------|------------------|-------------------|---------|
| <b>Figure 1</b>               |       |                  |                   |         |
| C                             | ELISA | 0.0007           | T-test            | ***     |
| D                             | ELISA | 0.0007           | T-test            | ***     |
| I                             | qPCR  | 0.0034           | ANOVA + Dunnett's | **      |
| J                             | qPCR  | 0.0361           | ANOVA + Dunnett's | *       |
| K                             | qPCR  | 0.0338, 0.0167   | ANOVA + Dunnett's | *, *    |
| M                             | qPCR  | 0.0189           | ANOVA + Dunnett's | *       |
| <b>Figure 2</b>               |       |                  |                   |         |
| B                             | FACS  | 0.0303           | T-test            | *       |
| C                             | FACS  | 0.0301           | T-test            | *       |
| D                             | qPCR  | 0.0001           | T-test            | ***     |
| E                             | WB    | < 0.0001         | T-test            | ****    |
| L                             | CNV   | 0.0089           | T-test            | **      |
| N                             | CNV   | 0.0069           | T-test            | **      |
| <b>Figure 3</b>               |       |                  |                   |         |
| A                             | qPCR  | 0.0463           | T-test            | *       |
| B                             | qPCR  | 0.0063           | T-test            | **      |
| E                             | qPCR  | 0.0409           | T-test            | *       |
| J                             | WB    | 0.0416           | T-test            | *       |
| K                             | qPCR  | 0.0335           | T-test            | *       |
| L                             | qPCR  | 0.0332           | T-test            | *       |
| N                             | FACS  | 0.0028           | T-test            | **      |
| O                             | FACS  | 0.0025           | T-test            | **      |
| <b>Figure 4</b>               |       |                  |                   |         |
| F                             | CNV   | 0.0074           | T-test            | **      |
| H                             | CNV   | 0.0005           | T-test            | ***     |
| J                             | CNV   | < 0.0001, 0.0197 | ANOVA + Tukey's   | ****, * |
| L                             | CNV   | < 0.0001, 0.0238 | ANOVA + Tukey's   | ****, * |
| <b>Expanded View Figure 1</b> |       |                  |                   |         |
| D                             | FACS  | 0.0002           | T-test            | ***     |
| E                             | FACS  | 0.0075           | T-test            | **      |
| <b>Expanded View Figure 3</b> |       |                  |                   |         |
| A                             | qPCR  | 0.041            | T-test            | *       |

*T-test = Student's unpaired t-test, ANOVA + Dunnett's = Ordinary one-way ANOVA with Dunnett's multiple comparisons test, ANOVA + Tukey's = Ordinary one-way ANOVA with Tukey's multiple comparisons test*

## Appendix Table S1: Table of p values
